# Supplementary material for: APOL1 Renal Risk Variants and Kidney Function in HIV-1–Infected People From Sub-Saharan Africa
Source: PubMed Central journal article supplement — Kidney Int Rep. 2021 Oct 16;7(3):483–93. doi: 10.1016/j.ekir.2021.10.009 (PMC8897309; doi:10.1016/j.ekir.2021.10.009), 2021-10-16
Supplement: mmc1.pdf [file mmc1.pdf]

**Supplementary Table S1.** Baseline characteristics of all participants.

|                                            | <b>Day care unit</b><br><b>N=413 (52.8%)</b> | <b>2LADY</b><br><b>N= 369 (47.2%)</b> | <b>p-value</b>   | <b>Total</b><br><b>N= 782</b> |
|--------------------------------------------|----------------------------------------------|---------------------------------------|------------------|-------------------------------|
| <b>Female</b>                              | 302 (73.1)                                   | 263 (71.3)                            | 0.564            | 565 (72.3)                    |
| <b>Age (years)</b>                         | 37.0 (31.0-43.4)                             | 38.0 (33.0-47.0)                      | <b>&lt;0.001</b> | 37.4 (32.0-45.0)              |
| <b>BMI (kg/m<sup>2</sup>)*</b>             | 20.8 (18.4-23.7)                             | 23.5 (21.2-26.4)                      | <b>&lt;0.001</b> | 22.1 (19.6-25.3)              |
| <b>BMI ≥ 25 kg/m<sup>2</sup>*</b>          | 74 (18.1)                                    | 126 (34.2)                            | <b>&lt;0.001</b> | 200 (25.7)                    |
| <b>CD4 count (cells/μl)*</b>               | 202 (103-342)                                | 176 (79-288)                          | <b>0.005</b>     | 190 (91-310)                  |
| <b>CD4 count &lt;200cells/μl*</b>          | 199 (49.3)                                   | 213 (57.7)                            | <b>0.018</b>     | 412 (53.3)                    |
| <b>eGFR (ml/min/1.73m<sup>2</sup>)</b>     | 99.3 (86.1-111.7)                            | 95.7 (80.9-111.2)                     | <b>0.019</b>     | 97.5 (83.3-111.5)             |
| <b>eGFR&lt;60 ml/min/1.73m<sup>2</sup></b> | 8 (1.9)                                      | 11 (3.0)                              | 0.344            | 19 (2.4)                      |
| <b>Glycaemia (mmol/ml)</b>                 | 4.8 (4.4-5.2)                                | 4.4 (4.1-4.9)                         | 0.313            | 4.6 (4.2-5.1)                 |
| <b>Creatinine (μmol/ml)</b>                | 70 (63-82)                                   | 71 (62-86)                            | 0.258            | 71 (62-86)                    |
| <b>Diabetes</b>                            | 1 (0.2)                                      | 2 (0.5)                               | 0.498            | 3 (0.4)                       |
| <b>Hypertension*</b>                       | 24 (6.0)                                     | 27 (7.3)                              | 0.469            | 51 (6.6)                      |
| <b>APOL1 high-risk genotype</b>            | 22 (5.3)                                     | 12 (3.3)                              | 0.156            | 34 (4.4)                      |

Quantitative variables: median (IQR); Categorical variables: n (%). eGFR: estimated glomerular filtration rate; BMI: body mass index.

Significant pvalues (P<0.05) are in bold.

\*Missing value = 3 for BMI; 9 for CD4 cells count; 14 for hypertension

**Supplementary Table S2.** Baseline characteristics of the day care unit (DCU) cohort participants stratified by *APOL1* risk status.

|                                            |               | <b><i>APOL1</i> low risk<br/>genotype</b> | <b><i>APOL1</i> high risk<br/>genotype</b> | <b>p-value</b> | <b>Total<br/>N= 413</b> |
|--------------------------------------------|---------------|-------------------------------------------|--------------------------------------------|----------------|-------------------------|
|                                            |               | <b>N=391 (94.7%)</b>                      | <b>N= 22 (5.3%)</b>                        |                |                         |
| <b>Female</b>                              |               | 286 (73.2)                                | 16 (72.7)                                  | 0.966          | 302 (73.1)              |
| <b>Age (years)</b>                         |               | 36.9 (31.0-43.4)                          | 38.1 (30.8-43.7)                           | 0.889          | 37.0 (31.0-43.4)        |
| <b>Age categories (years)</b>              | <b>&lt;30</b> | 83 (21.2)                                 | 5 (22.7)                                   | 0.951          | 88 (21.3)               |
|                                            | <b>30-39</b>  | 168 (43.0)                                | 10 (45.5)                                  |                | 178 (43.1)              |
|                                            | <b>40-49</b>  | 102 (26.1)                                | 6 (27.3)                                   |                | 108 (26.2)              |
|                                            | <b>≥50</b>    | 38 (9.7)                                  | 1 (4.5)                                    |                | 39 (9.4)                |
| <b>BMI (kg/m<sup>2</sup>)*</b>             |               | 20.8 (18.3-23.6)                          | 22.4 (19.5-24.2)                           | 0.094          | 20.8 (18.4-23.7)        |
| <b>BMI ≥ 25 kg/m<sup>2</sup>*</b>          |               | 69 (17.8)                                 | 5 (22.7)                                   | 0.569          | 74 (18.1)               |
| <b>CD4 count (cells/μl)*</b>               |               | 199 (99-332)                              | 289 (141-395)                              | 0.146          | 202 (103-342)           |
| <b>CD4 count &lt;200cells/μl*</b>          |               | 192 (50.3)                                | 7 (31.8)                                   | 0.092          | 199 (49.3)              |
| <b>eGFR (ml/min/1.73m<sup>2</sup>)</b>     |               | 99.4 (86.0-112.4)                         | 97.2 (87.4-107.2)                          | 0.499          | 99.3 (86.1-111.7)       |
| <b>eGFR&lt;60 ml/min/1.73m<sup>2</sup></b> |               | 7 (1.8)                                   | 1 (4.6)                                    | 0.357          | 8 (1.9)                 |
| <b>Glycaemia (mmol/ml)</b>                 |               | 4.8 (4.4-5.2)                             | 4.9 (4.6-5.4)                              | 0.313          | 4.8 (4.4-5.2)           |
| <b>Creatinine (μmol/ml)</b>                |               | 70 (63-82)                                | 73 (66-82)                                 | 0.398          | 70 (63-82)              |
| <b>Diabetes</b>                            |               | 1 (0.3)                                   | 0                                          | 1.000          | 1 (0.2)                 |
| <b>Hypertension*</b>                       |               | 22 (5.8)                                  | 2 (10.5)                                   | 0.319          | 24 (6.0)                |

Quantitative variables: median (IQR); Categorical variables: n (%). eGFR: estimated glomerular filtration rate; BMI: body mass index

\*Missing value = 3 for BMI; 9 for CD4 cells count; 14 for hypertension

**Supplementary Table S3.** Baseline characteristics of the 2LADY cohort participants stratified by *APOL1* risk status.

|                                            |                     | <b><i>APOL1</i> low risk<br/>genotype</b> | <b><i>APOL1</i> high risk<br/>genotype</b> | <b>p-value</b> | <b>Total<br/>N= 369</b> |
|--------------------------------------------|---------------------|-------------------------------------------|--------------------------------------------|----------------|-------------------------|
|                                            |                     | <b>N=357 (96.7%)</b>                      | <b>N= 12 (3.3%)</b>                        |                |                         |
|                                            | <b>Burkina Faso</b> | 46 (97.9)                                 | 1 (2.1)                                    | 1.000          | 47 (12.7)               |
| <b>Site of inclusion</b>                   | <b>Cameroon</b>     | 283 (96.6)                                | 10 (3.4)                                   |                | 293 (79.4)              |
|                                            | <b>Senegal</b>      | 28 (96.6)                                 | 1 (3.4)                                    |                | 29 (7.9)                |
|                                            |                     | 254 (71.2)                                | 9 (75.0)                                   | 1.000          | 264 (71.3)              |
| <b>Female</b>                              |                     |                                           |                                            |                |                         |
| <b>Age (years)</b>                         |                     | 38.0 (33.0-47.0)                          | 36.0 (31.0-45.5)                           | 0.780          | 38.0 (33.0-47.0)        |
| <b>Age categories (years)</b>              | <b>&lt;30</b>       | 42 (11.8)                                 | 2 (16.7)                                   | 0.921          | 44 (11.9)               |
|                                            | <b>30-39</b>        | 153 (42.9)                                | 5 (41.6)                                   |                | 158 (42.8)              |
|                                            | <b>40-49</b>        | 103 (28.8)                                | 3 (25.0)                                   |                | 106 (28.7)              |
|                                            | <b>≥50</b>          | 59 (16.5)                                 | 2 (16.7)                                   |                | 61 (16.5)               |
| <b>BMI (kg/m<sup>2</sup>)</b>              |                     | 23.5 (21.3-26.4)                          | 22.0 (20.6-26.5)                           | 0.577          | 23.5 (21.2-26.4)        |
| <b>BMI ≥ 25 kg/m<sup>2</sup></b>           |                     | 122 (34.2)                                | 4 (33.3)                                   | 1.000          | 126 (34.2)              |
| <b>CD4 count (cells/μl)</b>                |                     | 176 (78-283)                              | 241 (152-323)                              | 0.350          | 176 (79-288)            |
| <b>CD4 count &lt;200cells/μl</b>           |                     | 208 (58.3)                                | 5 (41.7)                                   | 0.252          | 213 (57.7)              |
| <b>Viral load Log<sub>10</sub></b>         |                     | 4.5 (4.1-5.1)                             | 4.2 (3.6-4.7)                              | 0.075          | 4.5 (4.1-5.1)           |
| <b>Viral load ≥ 5log/ml</b>                |                     | 96 (26.9)                                 | 3 (25.0)                                   | 1.000          | 99 (26.8)               |
| <b>eGFR (ml/min/1.73m<sup>2</sup>)</b>     |                     | 95.6 (80.4-110.5)                         | 105.4 (85.2-115.9)                         | 0.188          | 95.7 (80.9-111.2)       |
| <b>eGFR&lt;60 ml/min/1.73m<sup>2</sup></b> |                     | 10 (2.8)                                  | 1 (8.3)                                    | 0.308          | 11 (3.0)                |

|                                          |                  |                  |       |                  |
|------------------------------------------|------------------|------------------|-------|------------------|
| <b>Total cholesterol (mmol/ml) *</b>     | 4.8 (4.1-5.5)    | 4.6 (4.0-5.5)    | 0.805 | 4.7 (4.1-5.5)    |
| <b>LDL cholesterol (mmol/ml) *</b>       | 2.8 (2.1-3.5)    | 2.3 (2.0-2.9)    | 0.210 | 2.8 (2.1-3.5)    |
| <b>HDL cholesterol (mmol/ml) *</b>       | 1.3 (1.1-1.7)    | 1.3 (1.1-2.2)    | 0.721 | 1.3 (1.1-1.7)    |
| <b>Triglyceride (mmol/ml)*</b>           | 1.0 (0.7-1.3)    | 1.2 (0.9-1.9)    | 0.186 | 1.0 (0.7-1.4)    |
| <b>Glycaemia (mmol/ml) *</b>             | 4.4 (4.1-4.9)    | 4.2 (4.0-4.4)    | 0.106 | 4.4 (4.1-4.9)    |
| <b>Creatinine (µmol/ml)</b>              | 70.7 (61.9-87.5) | 68.8 (58.6-75.2) | 0.140 | 71 (62-86)       |
| <b>Diabetes</b>                          | 2 (0.6)          | 0                | 1.000 | 2 (0.5)          |
| <b>Hypertension</b>                      | 25 (7.0)         | 2 (16.7)         | 0.216 | 27 (7.3)         |
| <b>Metabolic syndrome</b>                | 51 (14.3)        | 2 (16.7)         | 0.685 | 53 (14.4)        |
| <b>Proteinuria ≥ + *</b>                 | 38 (10.8)        | 0                | 0.622 | 38 (10.4)        |
| <b>Duration of 1st line ART (months)</b> | 51.7 (34.6-70.6) | 54.6 (44.2-75.0) | 0.442 | 51.7 (35.7-70.9) |

Quantitative variables: median (IQR); Categorical variables: n (%). eGFR: estimated glomerular filtration rate; BMI: body mass index; ART: antiretroviral treatment  
 \*Missing values = 1 for total cholesterol, triglycerides and glycaemia; 2 for HDL-cholesterol and LDL-cholesterol; 4 for proteinuria

**Supplementary Table S4a.** Prevalence of *APOL1* risk alleles.

|                             | <i>APOL1</i> risk alleles |                           |     |                           | Total    |
|-----------------------------|---------------------------|---------------------------|-----|---------------------------|----------|
|                             | G1                        |                           | G2  |                           | G0+G1+G2 |
|                             | N                         | P [CI <sub>95</sub> ] (%) | N   | P [CI <sub>95</sub> ] (%) | N        |
| <b>Day care unit cohort</b> | 113                       | 13.7 [11.5-16.2]          | 89  | 10.8 [8.8-13.1]           | 826      |
| <b>Burkina Faso</b>         | 12                        | 12.8 [7.4-21.2]           | 7   | 7.4 [3.6-14.8]            | 94       |
| <b>2LADY cohort</b>         |                           |                           |     |                           |          |
| <b>Senegal</b>              | 5                         | 8.6 [3.6-19.1]            | 9   | 15.5 [8.3-27.2]           | 58       |
| <b>Cameroon</b>             | 51                        | 8.7 [6.7-11.3]            | 52  | 8.9 [6.8-11.5]            | 586      |
| <b>Entire 2LADY cohort</b>  | 68                        | 9.2 [7.3-11.5]            | 68  | 9.2 [7.3-11.5]            | 738      |
| <b>Burkina Faso*</b>        | 125                       | 13.6 [11.5-16.0]          | 96  | 10.4 [8.6-12.6]           | 920      |
| <b>West Africa*</b>         | 130                       | 13.3 [11.3-15.6]          | 105 | 10.7 [8.9-12.8]           | 1564     |

\*Burkina Faso=Burkina Faso in 2LADY + Day care unit cohort combined; \*West Africa = Burkina Faso + Senegal; N: number of alleles. P: prevalence; CI<sub>95</sub>: 95% confidence intervals

**Supplementary Table S4b.** Distribution of *APOL1* genotypes.

|                             | G0/G0 | G0/G1 | G0/G2 | G1/G1 | G2/G2 | G1/G2 |
|-----------------------------|-------|-------|-------|-------|-------|-------|
|                             | N     | N     | N     | N     | N     | N     |
| <b>Day care unit cohort</b> | 233   | 90    | 68    | 6     | 5     | 11    |
| <b>All sites</b>            | 245   | 54    | 58    | 3     | 1     | 8     |
| <b>2LADY cohort</b>         |       |       |       |       |       |       |
| <b>Burkina Faso</b>         | 29    | 11    | 6     | 0     | 0     | 1     |
| <b>Senegal</b>              | 16    | 4     | 8     | 0     | 0     | 1     |
| <b>Cameroon</b>             | 200   | 39    | 44    | 3     | 1     | 6     |
| <b>Burkina Faso*</b>        | 262   | 101   | 74    | 6     | 5     | 12    |
| <b>West Africa*</b>         | 278   | 105   | 82    | 6     | 5     | 13    |

\*Burkina Faso=Burkina Faso in 2LADY + Day care unit cohort combined; \*West Africa = Burkina Faso + Senegal; N: number of individuals

**Supplementary Table S5.** Factors associated with eGFR in the 2LADY cohort at baseline.

|                                  | eGFR<br>(ml/min/1.73m <sup>2</sup> ) | CI95%         | p-value           |
|----------------------------------|--------------------------------------|---------------|-------------------|
| <b>Age (years)</b>               | -0.8                                 | [-1.0 ; -0.6] | <b>&lt;0.0001</b> |
| <b>Glycemia</b>                  | 2.3                                  | [-0.0 ; 4.6]  | 0.0547            |
| <b>Hypertension</b>              | -0.7                                 | [-7.8 ; 6.4]  | 0.8551            |
| <b>HIV viral load ≥5log/ml</b>   | 7.7                                  | [3.6 ; 11.8]  | <b>0.0003</b>     |
| <b>CD4 count &lt;200cells/μl</b> | 5.1                                  | [1.5 ; 8.8]   | <b>0.0063</b>     |

eGFR: estimated glomerular filtration rate; CI95%: 95% confidence intervals.  
Significant p-values (P<0.05) are in bold.

**Supplementary Table S6.** Follow-up data by study cohort.

|                                                                                | Day care unit<br>cohort | 2LADY cohort      |
|--------------------------------------------------------------------------------|-------------------------|-------------------|
| Duration of follow-up in years, median (Interquartile range)                   | 6.1 (4.2-8.2)           | 4.8 (3.9-5.4)     |
| Number of persons-years of follow-up                                           | 2440                    | 1560              |
| Number of medical visits done                                                  | 6281                    | 7597              |
| Number of creatinine measurements                                              | 4824                    | 4919              |
| Average number of creatinine measurements by patient, [CI <sub>95%</sub> ]     | 1.9 [1.9 ; 2.0]         | 3.1 [3.0 ; 3.1]   |
| Annual mean change in eGFR (ml/min/1,73m <sup>2</sup> ), [CI <sub>95%</sub> ]  | -0.8 [-1.0 ; -0.6]      | 2,0 [1,7 ; 2,3]   |
| Number of CKD occurred during follow-up                                        | 14                      | 16                |
| Incidence of CKD (number of cases by 1000 persons-years), [CI <sub>95%</sub> ] | 5.7 [3.4 ; 9.7]         | 10.3 [6.3 ; 16.8] |

eGFR: estimated glomerular filtration rate; CKD: chronic kidney disease; CI95%: 95% confidence intervals

**Supplementary Table S7.** Baseline predictors of eGFR annual change in the 2LADY cohort.

|                                                  | eGFR<br>(ml/min/1.73m <sup>2</sup> )/year | CI95%         | p-value           |
|--------------------------------------------------|-------------------------------------------|---------------|-------------------|
| Baseline age (year)                              | -0.4                                      | [-0.5 ; -0.3] | <b>&lt;0.0001</b> |
| Baseline eGFR<br>(/10ml/min/1.73m <sup>2</sup> ) | 5.4                                       | [4.9 ; 6.0]   | <b>&lt;0.0001</b> |
| Baseline glycemia                                | 2.0                                       | [0.8 ; 3.2]   | <b>0.0013</b>     |
| HIHypertention at baseline                       | -0.6                                      | [-4.3 ; 3.1]  | 0.7488            |
| Baseline CD4 count <200cells/μl                  | -1.6                                      | [-3.5 ; 0.3]  | 0.1075            |
| High risk genotype                               | -0.7                                      | [-5.9 ; 4.6]  | 0.8046            |
| Viral load≥5log/ml#time                          | -1.2                                      | [-2.0 ; -0.4] | <b>0.0018</b>     |

eGFR: estimated glomerular filtration rate; #: interaction term; CI95%: 95% confidence intervals  
Significant p-values (P<0.05) are in bold.

**Supplementary Table S8.** Baseline predictors of eGFR annual change in the 2LADY cohort by stratifying with the interaction between *APOL1* and baseline HIV viral load.

|                                                    | eGFR<br>(ml/min/1.73m <sup>2</sup> )/year | CI95%         | p-value           |
|----------------------------------------------------|-------------------------------------------|---------------|-------------------|
| <b>Baseline age (years)</b>                        | -0.4                                      | [-0.5 ; -0.3] | <b>&lt;0.0001</b> |
| <b>Baseline eGFR (/10ml/min/1.73m<sup>2</sup>)</b> | 5.5                                       | [4.9 ; 6.0]   | <b>&lt;0.0001</b> |
| <b>Baseline glycemia</b>                           | 2.0                                       | [0.8 ; 3.2]   | <b>0.0014</b>     |
| <b>Hypertention at baseline</b>                    | -0.8                                      | [-4.5 ; 2.9]  | 0.6796            |
| <b>Baseline CD4 count &lt;200cells/μl</b>          | -1.7                                      | [-3.6 ; 0.3]  | 0.0901            |
| <b>APOL1#HIV</b>                                   |                                           |               |                   |
| <b>LR &amp; VL&lt;5log/ml</b>                      | Reference                                 | ---           | ---               |
| <b>baseline viral</b>                              |                                           |               |                   |
| <b>HR &amp; VL&lt;5log/ml</b>                      | -0.4                                      | [-2.8 ; 2.1]  | 0.7801            |
| <b>load#time</b>                                   |                                           |               |                   |
| <b>LR &amp; VL≥5log/ml</b>                         | -1.1                                      | [-1.9 ; -0.4] | <b>0.0040</b>     |
| <b>HR &amp; VL≥5log/ml</b>                         | -3.9                                      | [-7.7 ; -0.1] | <b>0.0456</b>     |

eGFR: estimated glomerular filtration rate; LR: *APOL1* low risk genotype; HR: *APOL1* high risk genotype; VL: HIV viral load;  
#: interaction term; CI95%: 95% confidence intervals  
Significant p-values (P<0.05) are in bold.
